# Supplementary material for: In situ interfacial passivation with an arylphosphine oxide and phosphonate electron transporting layer for efficient all-solution-processed PeQLEDs
Source: Royal Society of Chemistry journal article supplement (doi:10.1039/d2nr03793a), 2022-01-01
Supplement: d2nr03793a1.pdf [file d2nr03793a1.pdf]

## Electronic Supporting Information (ESI)

### **In-Situ Interfacial Passivation by Arylphosphine Oxide and Phosphonate Electron Transporting Layer for Efficient All-Solution-Processed PeQLEDs**

*Xuefei Li,<sup>ac</sup> Yiting Tian,<sup>b</sup> Liuqing Yang,<sup>ac</sup> Shumeng Wang,<sup>\*c</sup> Lei Zhao,<sup>\*c</sup> and Junqiao Ding<sup>\*ac</sup>*

*<sup>a</sup>.School of Chemical Science and Technology, Yunnan University, Kunming 650091, P. R. China. E-mail: dingjunqiao@ynu.edu.cn*

*<sup>b</sup>.School of Materials and Energy, Yunnan University, Kunming 650091, P. R. China.*

*<sup>c</sup> State Key Laboratory of Polymer Physics and Chemistry, Changchun Institute of Applied Chemistry, Chinese Academy of Sciences, Changchun, 130022, P. R. China. E-mail: wangshumeng@ciac.ac.cn; zhaol@ciac.ac.cn.*

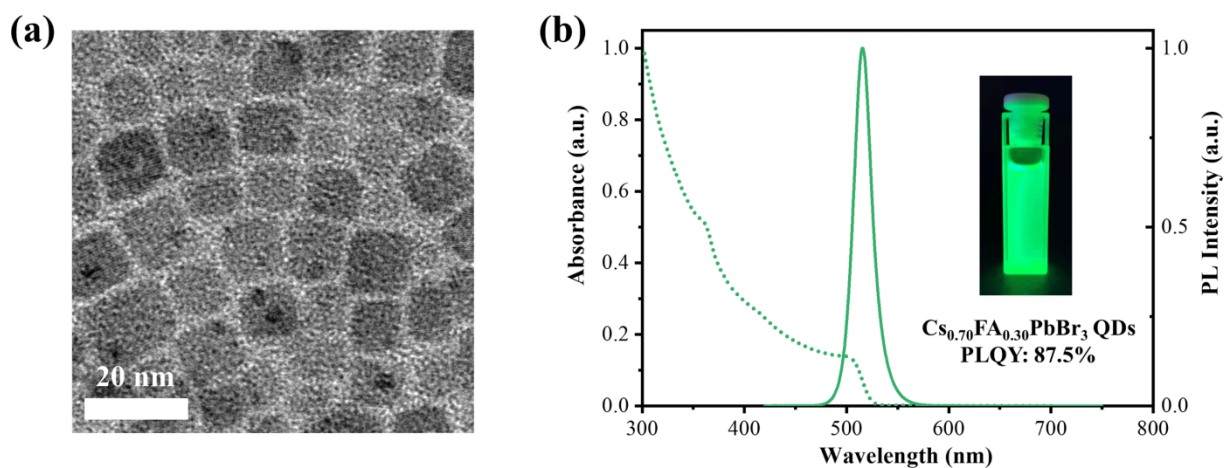

**Fig. S1** TEM images of  $\text{Cs}_{0.70}\text{FA}_{0.30}\text{PbBr}_3$  QDs (a). Absorption and PL spectra in toluene solution of  $\text{Cs}_{0.70}\text{FA}_{0.30}\text{PbBr}_3$  QDs (dash line: absorption spectra; solid line: PL spectra). Inset: photograph of  $\text{Cs}_{0.70}\text{FA}_{0.30}\text{PbBr}_3$  QDs solution in toluene under UV lamp with corresponding PLQY values listed on bottom (b).

**Table S1.** Physical parameters of used solvents.

| Solvent                                               | Chloro-<br>benzene | O-dichloro-<br>benzene | Methyl<br>benzoate | Methyl<br>acetate | Cyclohex-<br>-anone | Methanol | Ethanol | Isobutanol |
|-------------------------------------------------------|--------------------|------------------------|--------------------|-------------------|---------------------|----------|---------|------------|
| b.p. <sup>a</sup><br>(°C)                             | 132.2              | 180.4                  | 198                | 57.8              | 155                 | 64.7     | 78      | 108        |
| $\mu^b$<br>(mPa·s)                                    | 0.8                | 1.33                   | 1.94               | 0.38              | 2.2                 | 0.6      | 1.2     | 4.7        |
| $\epsilon^c$<br>(C <sup>2</sup> /(N·M <sup>2</sup> )) | 5.6                | 9.9                    | 6.6                | 6.7               | 18.6                | 32.6     | 24.3    | 15.8       |

<sup>a</sup>Boiling point. <sup>b</sup>Viscosity at 20-25 °C. <sup>c</sup>Dielectric constant.

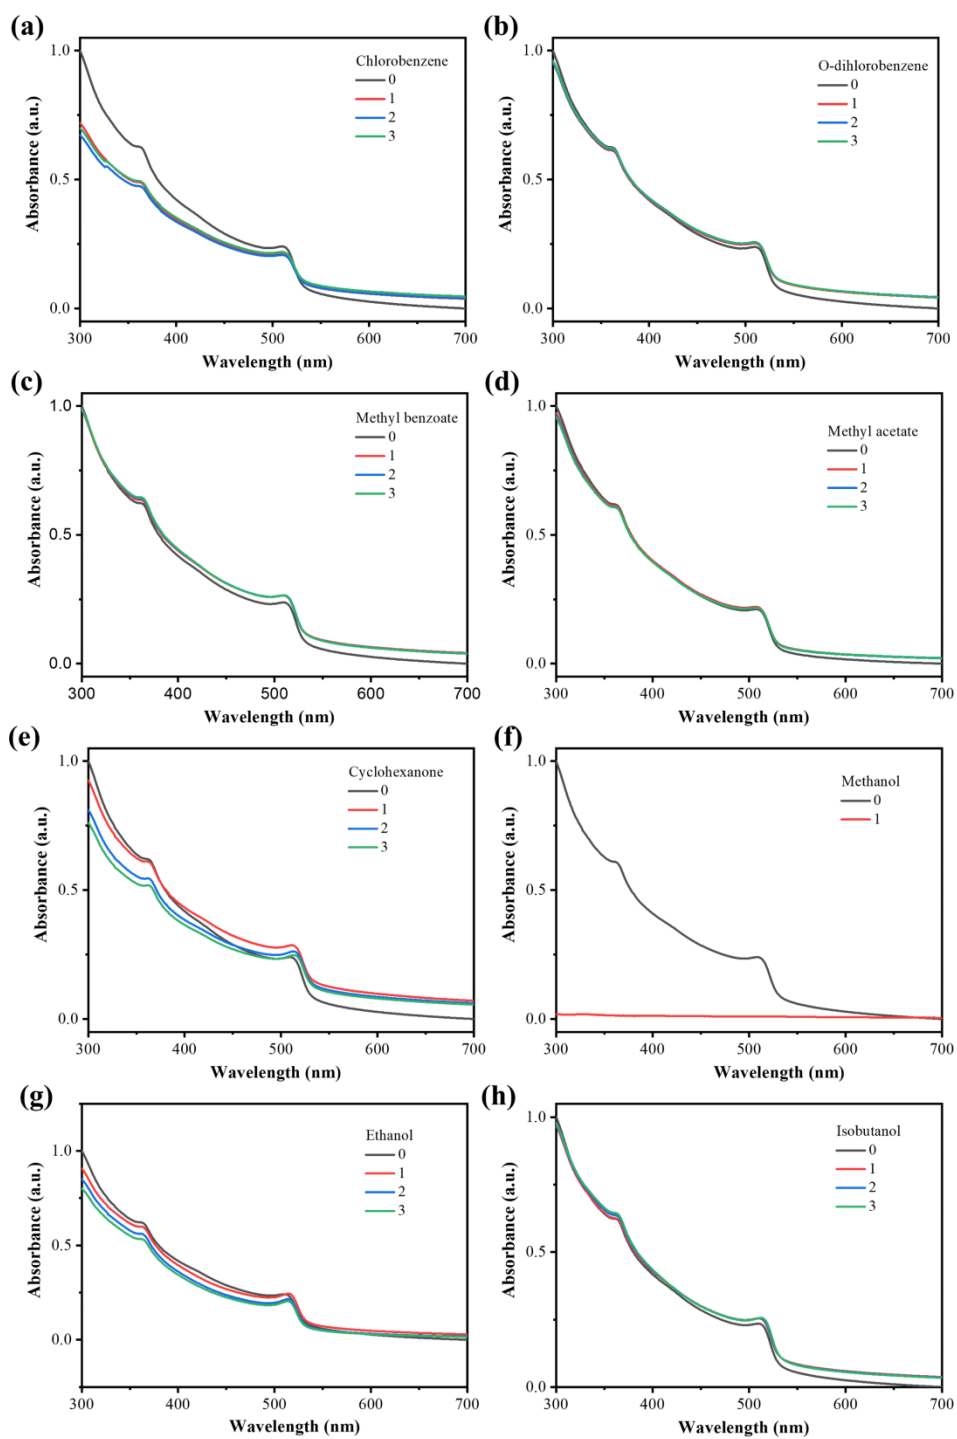

**Fig. S2** UV-Vis absorption spectra for PeQDs film after different spin-rinsing time with chlorobezene (a), O-chlorobezene (b), methyl benzoate (c), methyl acetate (d), cyclohexanone (e), methanol (f), ethanol (g) and isobutanol (h).

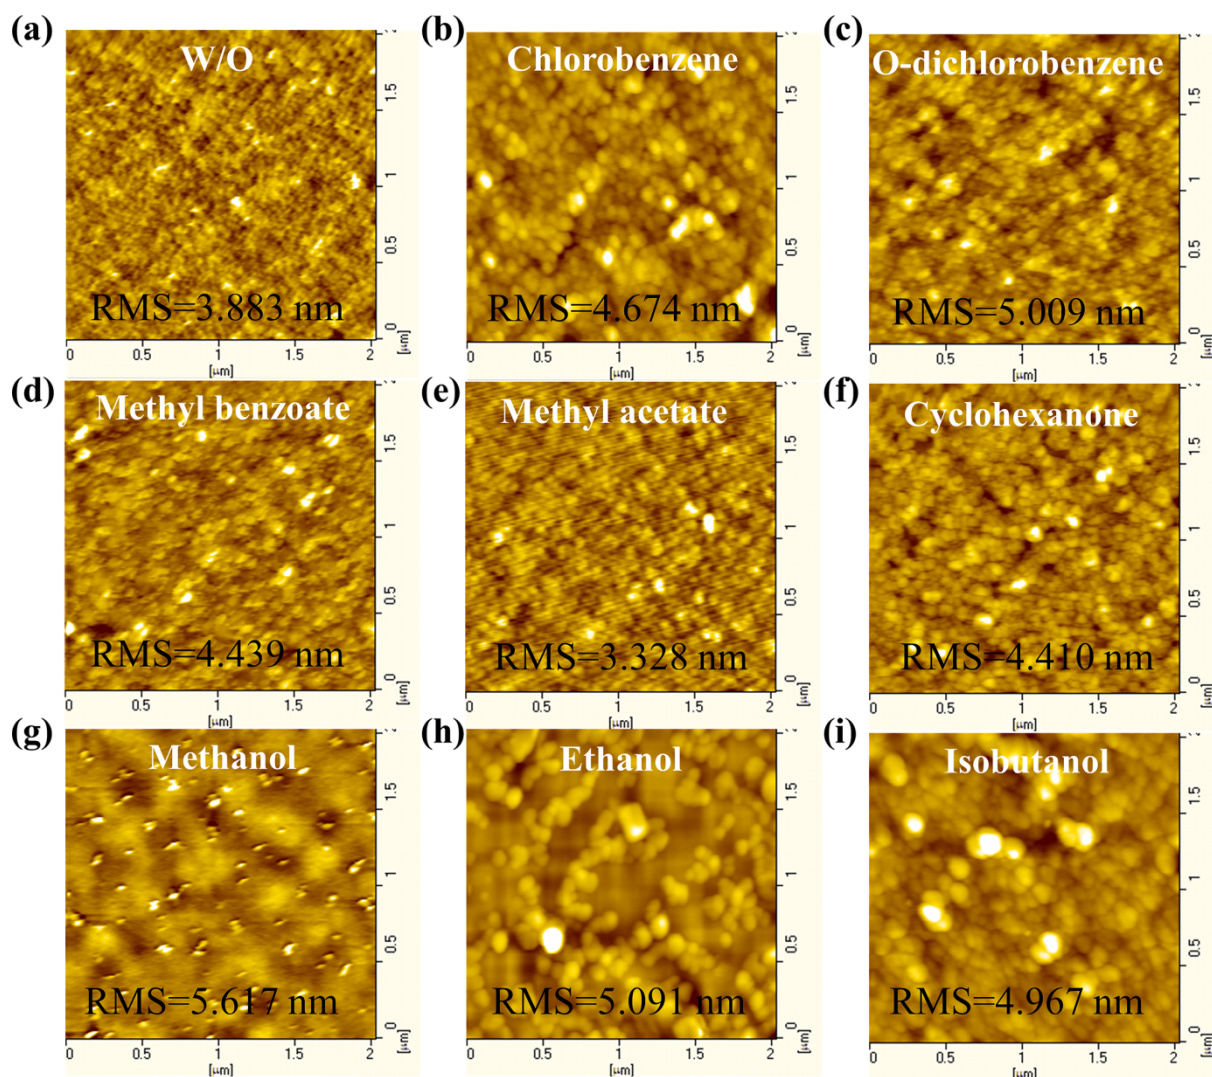

**Fig. S3** AFM images of PeQDs films before spin-rinsing (a) and after spin-rinsing with chlorobezene (b), O-chlorobezene (c), methyl benzoate (d), methyl acetate (e), cyclohexanone (f), methanol (g), ethanol (h) and isobutanol (i).

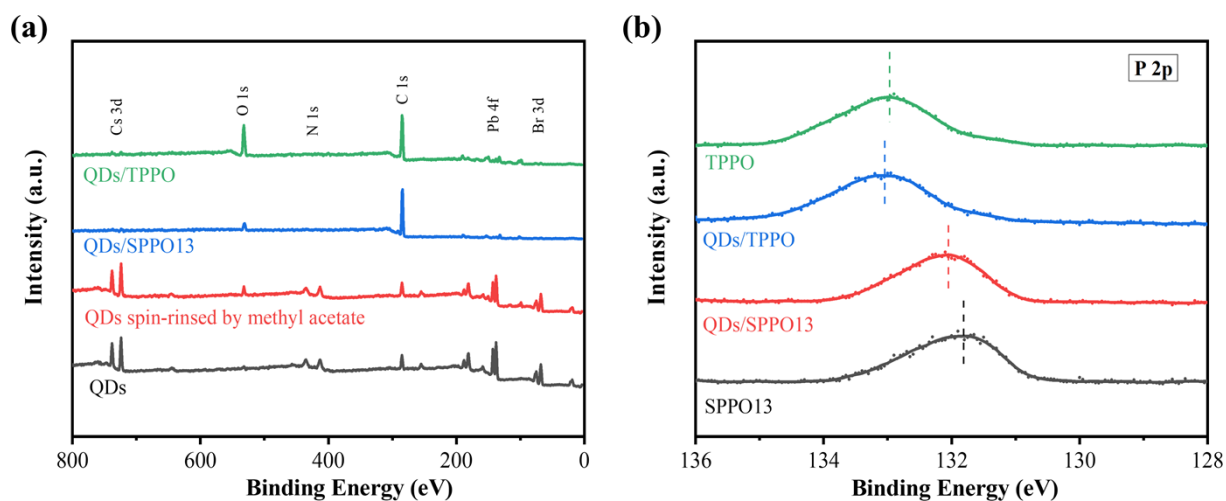

**Fig. S4** XPS spectra. (a) Survey spectra of pristine PeQDs films, QDs film spin-rinsed by methyl acetate, QDs/SPPO13 film and QDs/TPPO film. (b) P 2p spectra of QDs/SPPO13 film and QDs/TPPO film with SPPO13 and TPPO as references.

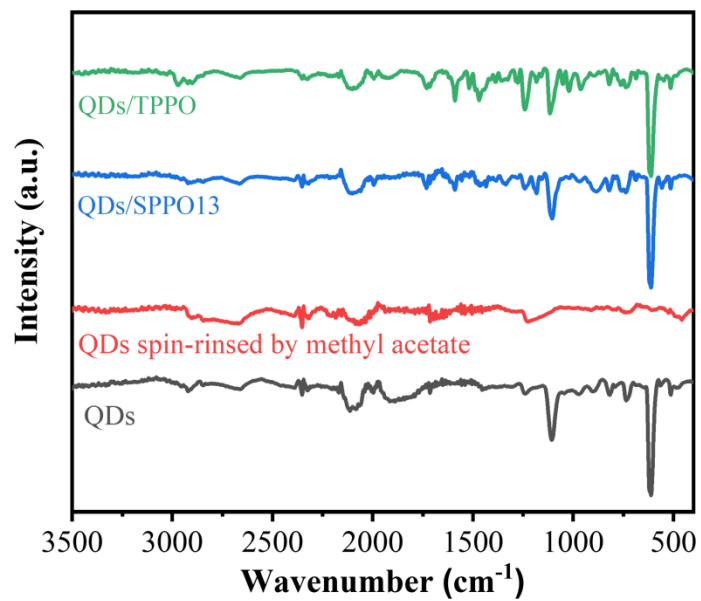

**Fig. S5** FTIR spectra for pristine PeQDs films, QDs film spin-rinsed by methyl acetate, QDs/SPPO13 film and QDs/TPPO film.

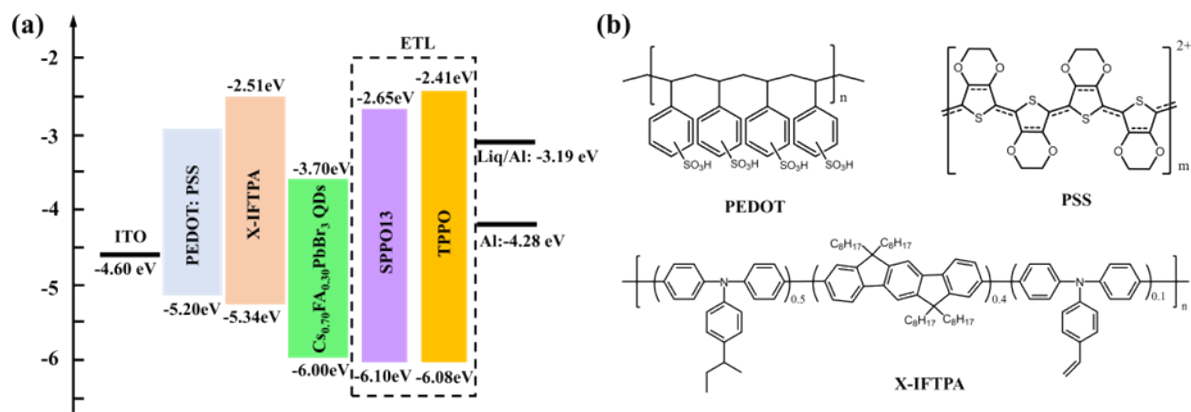

**Fig. S6** Energy diagram of the PeQLEDs (a). The molecular structure of PEDOT:PSS, and X-IFTPA (b).



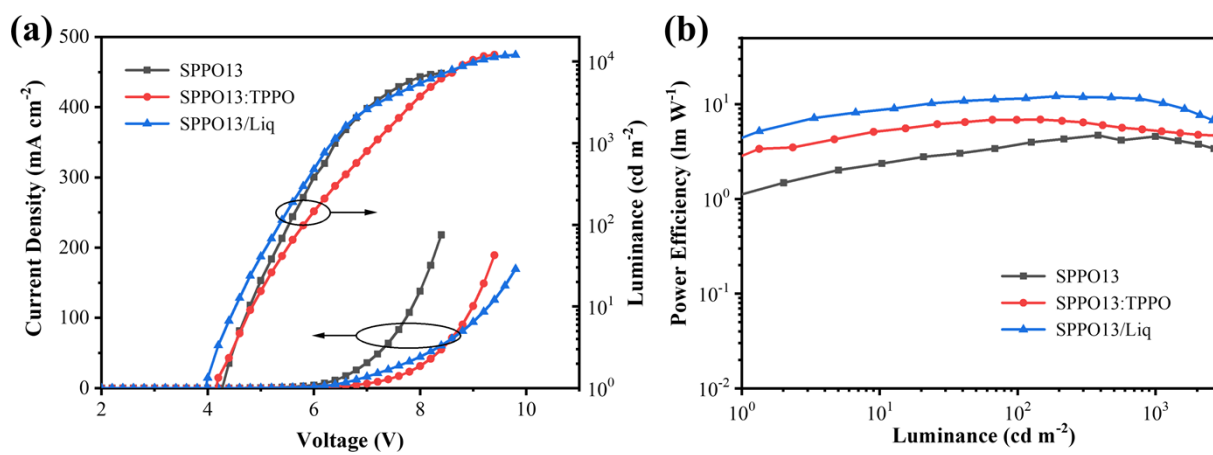

**Fig. S7** Current density–voltage–luminance ( $J$ - $V$ - $L$ ) curves (a) and power efficiency as a function of luminance (b) for the PeQLEDs.

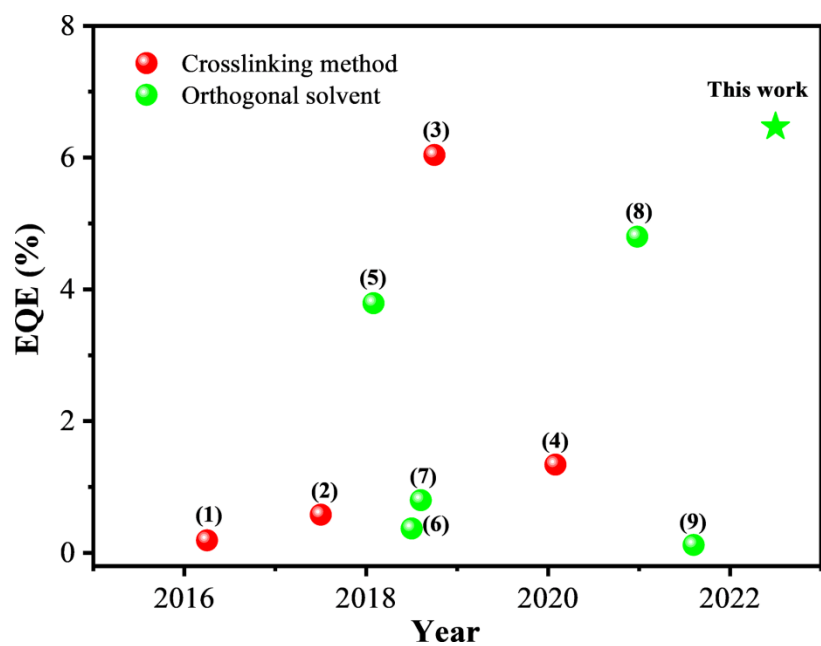

**Fig. S8** Comparison of EQE of all-solution-processed PeQLEDs based on different processing methods in recent years.

**Table S2.** Summary of device performance of all-solution-processed PeQLEDs based on different processing methods in recent years.

| Device structure                                                                                      | Processing method  | $\lambda_{EL}$ (nm) | L (cd m <sup>-2</sup> ) | CE (cd A <sup>-1</sup> ) | PE (lm W <sup>-1</sup> ) | EQE (%) | Ref.                                                            |
|-------------------------------------------------------------------------------------------------------|--------------------|---------------------|-------------------------|--------------------------|--------------------------|---------|-----------------------------------------------------------------|
| ITO/ZnO/CsPbX <sub>3</sub> QDs /TFB/MoO <sub>3</sub> /Ag                                              | Crosslinking       | 523                 | 2335                    | -                        | -                        | 0.19    | (1) <i>Adv. Mater.</i> <b>2016</b> , 28, 3528.                  |
| ITO/TiO <sub>2</sub> /Al <sub>2</sub> O <sub>3</sub> /MAPbBr <sub>3</sub> QDs/F8/MoO <sub>3</sub> /Al | Crosslinking       | 528                 | 7200                    | 2.47                     | -                        | 0.58    | (2) <i>Adv. Mater.</i> <b>2017</b> , 29, 1701153                |
| ITO/ZnO/FAPbBr <sub>3</sub> QDs /PVK/PTPDPt                                                           | Crosslinking       | 519                 | 12 998                  | 20.53                    | -                        | 6.04    | (3) <i>Chem. Mater.</i> <b>2018</b> , 30, 6231.                 |
| ITO/PeDOT:PSS/Poly-TPD /CsPbX <sub>3</sub> QDs/TPBi/LiF/Al                                            | Crosslinking       | 513                 | 2470                    | 4.19                     | -                        | 1.34    | (4) <i>J. Phys. Chem. Lett.</i> <b>2020</b> , 11, 1154.         |
| ITO/NiO/CsPbBr <sub>3</sub> QDs/ZnO/Al                                                                | Orthogonal solvent | 519                 | 6093.2                  | 7.96                     | 4.26                     | 3.79    | (5) <i>ACS Nano</i> <b>2018</b> , 12, 1462.                     |
| ITO/PeDOT:PSS/Poly-TPD /CsPbBr <sub>3</sub> QDs/ZnO/Al                                                | Orthogonal solvent | 510                 | 1661                    | 0.72                     | 0.75                     | 0.37    | (6) <i>Nano Energy</i> <b>2018</b> , 51, 358.                   |
| ITO/PeDOT:PSS/Poly-TPD /MAPbBr <sub>3</sub> QDs/TPBi/Ag                                               | Orthogonal solvent | 521                 | 2266                    | 3.26                     | -                        | 0.8     | (7) <i>ACS Appl. Mater. Interfaces</i> <b>2018</b> , 10, 27374. |
| ITO /NiO /Zn-doped CsPbBr <sub>3</sub> /ZnS QDs /ZnO /Ag                                              | Orthogonal solvent | 515                 | 8600                    | -                        | -                        | 4.8     | (8) <i>J. Mater. Sci.</i> <b>2021</b> , 56, 4161.               |
| ITO/PEDOT:PSS/poly-TPD /PTAA /core-shell PeQDs /AlZnO /LiF/Al                                         | Orthogonal solvent | 515                 | 3200                    | 5.3                      | -                        | 0.12    | (9) <i>ACS Appl. Mater. Interfaces</i> <b>2021</b> , 13, 29798. |
| ITO/PeDOT:PSS/X-IFTPA /CsPbX <sub>3</sub> QDs/ SPPO13/Liq/Al                                          | Orthogonal solvent | 520                 | 12058.6                 | 24.1                     | 12.1                     | 6.47    | This work                                                       |

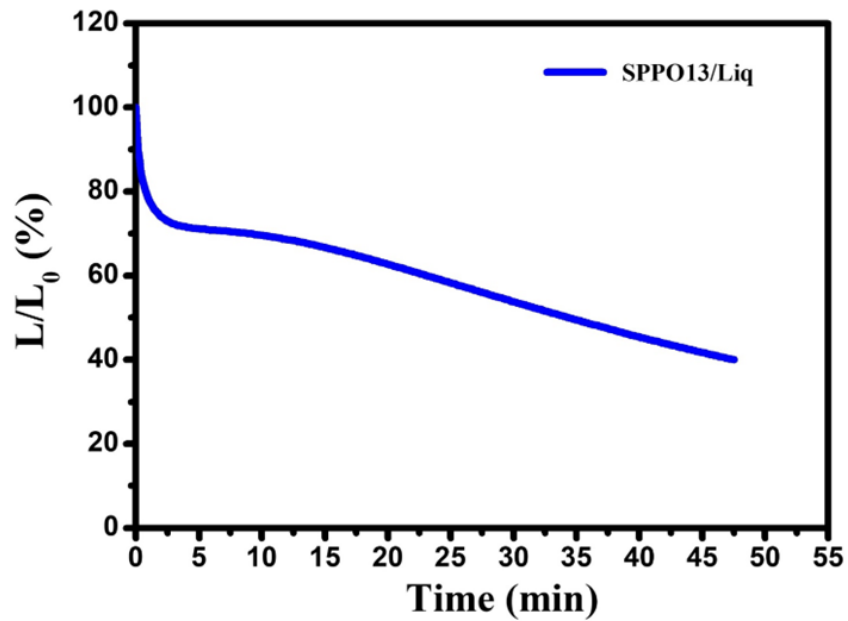

**Fig. S9** Lifetime curve of the all-solution-processed PeQLEDs using SPO13 and Liq as the electron transporting layer and electron injection layer. Lifetime was measured at initial luminance of 100 cd/m<sup>2</sup>.
